# Supplementary material for: Analysis of the Function of the Lymphocytic Choriomeningitis Virus S Segment Untranslated Region on Growth Capacity In Vitro and on Virulence In Vivo
Source: MDPI journal article supplement (doi:10.3390/v12080896), 2020-08-16
Supplement: s1 [file s1]

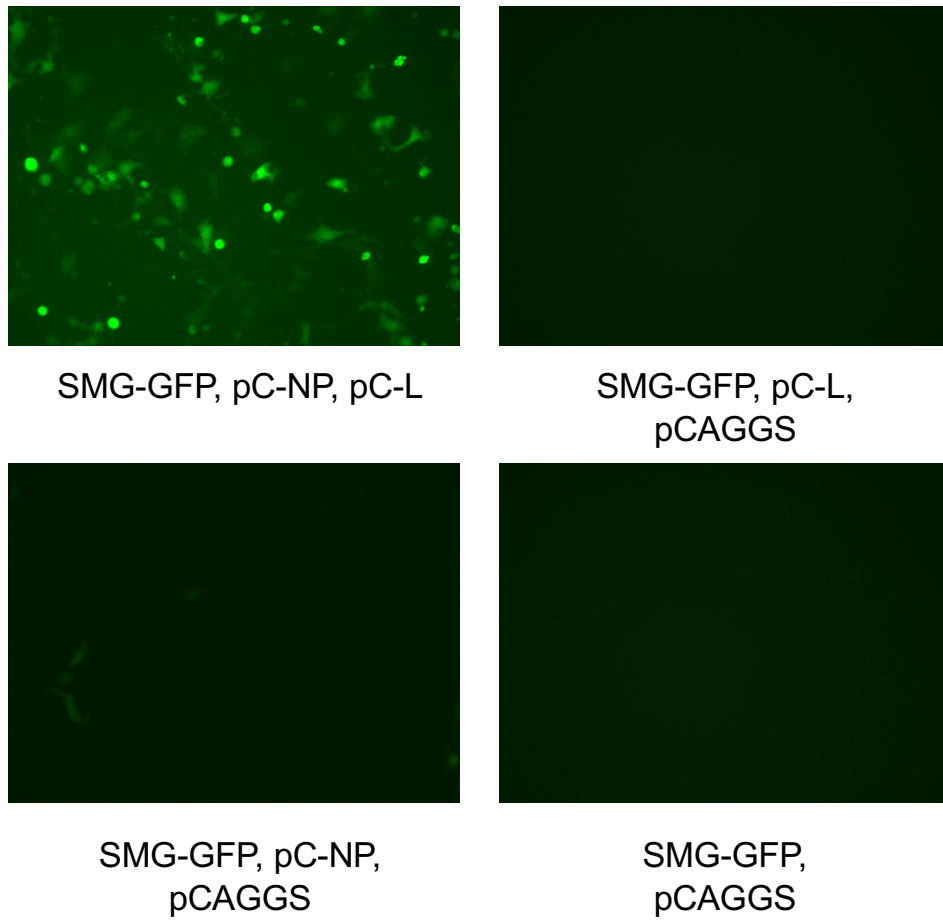

**Figure S3.** Establishment of a GFP expressing minigenome system for LCMV strain WE (LCMV-WE). BHK-21 cells were transfected with minigenome plasmids SMG-GFP, either pC-NP or pCAGGS, and either pC-L or pCAGGS. The transfected cells were incubated for 2 days at 37°C, and then the level of GFP expression was observed under a fluorescent microscope.
